# Supplementary material for: Multiomics Analyses of HNF4α Protein Domain Function during Human Pluripotent Stem Cell Differentiation
Source: PubMed Central journal article supplement (PMC6556878; doi:10.1016/j.isci.2019.05.028), 2019-05-24
Supplement: mmc1.pdf [file mmc1.pdf]

**ISCI, Volume 16**

## **Supplemental Information**

### **Multomics Analyses of HNF4 $\alpha$**

#### **Protein Domain Function**

#### **during Human Pluripotent Stem Cell Differentiation**

**Yu Wang, Michael H. Tatham, Wolfgang Schmidt-Heck, Carolyn Swann, Karamjit Singh-Dolt, Jose Meseguer-Ripolles, Baltasar Lucendo-Villarin, Tilo Kunath, Timothy R. Rudd, Andrew J.H. Smith, Jan G. Hengstler, Patricio Godoy, Ronald T. Hay, and David C. Hay**

## SUPPLEMENTAL INFORMATION

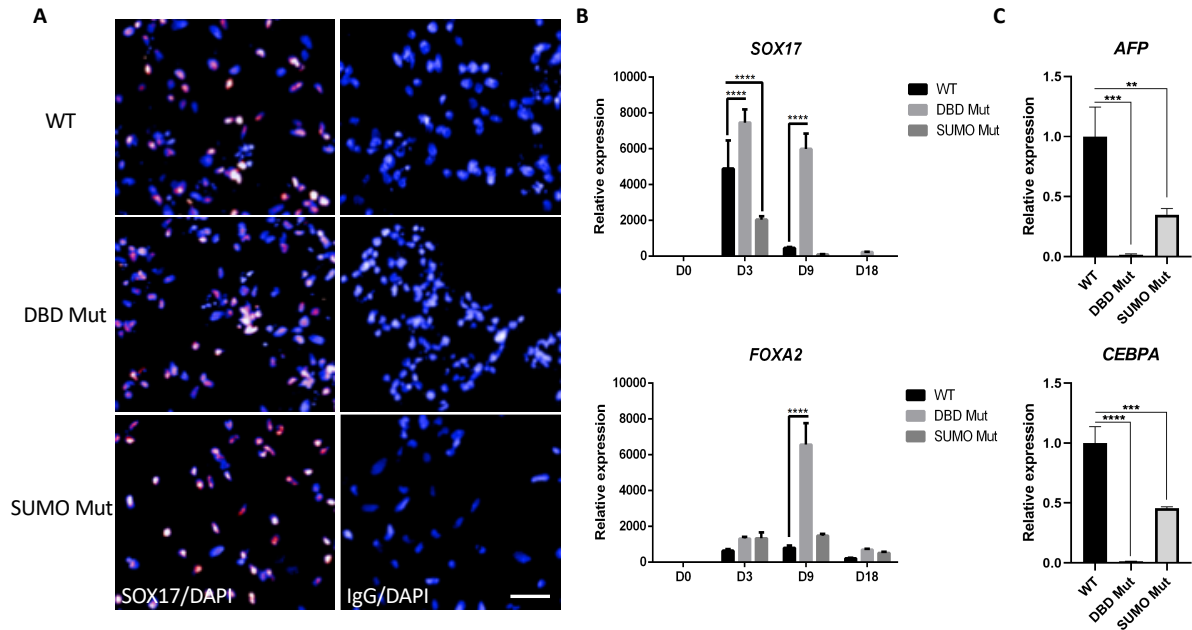

### Supplemental Figure 1

**Figure S1. Related to Figure 2, Differentiation towards the definitive endoderm was not affected in SUMO Mut cells, but was in DBD Mut cells.**

(A) Immunostaining of SOX17 in WT, DBD Mut and SUMO Mut pluripotent stem cells differentiated toward definitive endoderm. Scale bar = 50  $\mu$ m.

(B) The expression levels of *SOX17* and *FOXA2* during hepatic differentiation. Data were normalized to the housekeeping gene *ACTB* and expressed relative to day 0 cells. The results shown represent three biological replicates and error bars represent SD. \*\* $p < 0.01$ , \*\*\*  $p < 0.001$ , \*\*\*\*  $p < 0.0001$ ; two-way ANOVA with Tukey post hoc test.

(C) Real-time PCR quantification of *AFP* and *CEBPA* mRNA level. Data were normalized to the housekeeping gene *ACTB* and expressed relative to the WT cells. The results shown represent three biological replicates and error bars represent SD. \*\* $p < 0.01$ , \*\*\*  $p < 0.001$ , \*\*\*\*  $p < 0.0001$ ; one-way ANOVA with Tukey post hoc test.

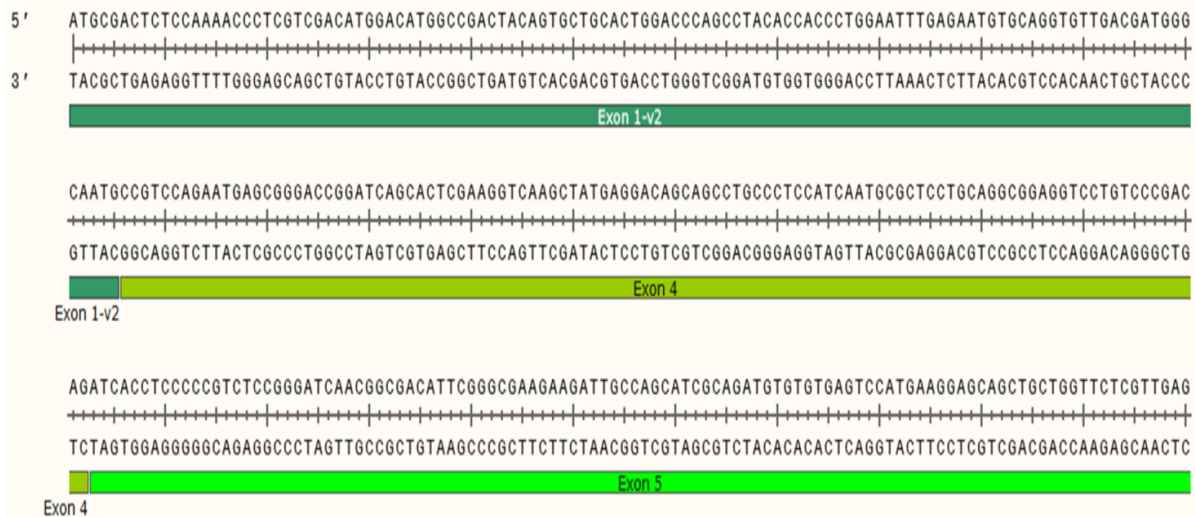

### Supplemental Figure 2

**Figure S2. Related to Figure 2B, Exons 2 and 3 were skipped in HNF4 $\alpha$  DBD Mut cells.**

Sequencing of HNF4 $\alpha$  cDNA in the DBD Mut cells at hepatic progenitor stage showed exon 2 and 3 were skipped.

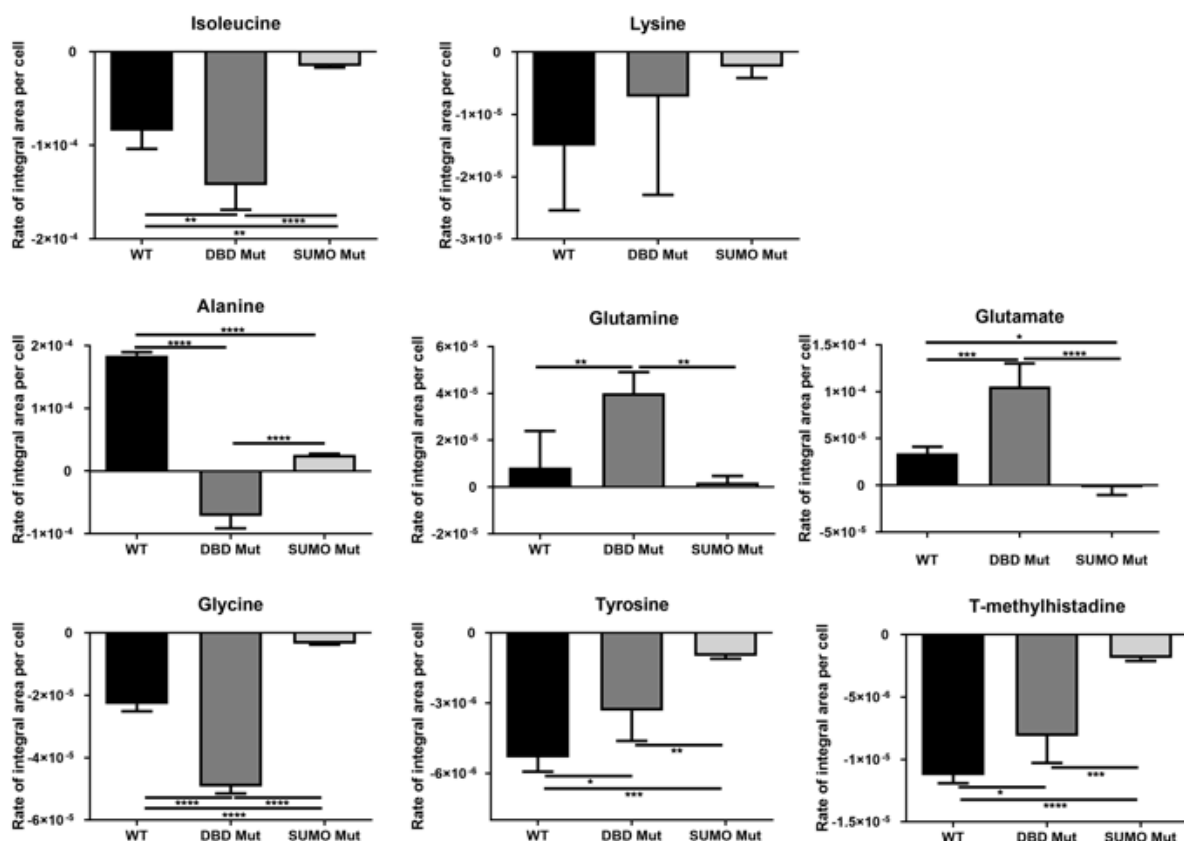

### Supplemental Figure 3

**Figure S3. Related to Figure 3, Amino acid metabolism was disrupted in the DBD Mut and SUMO Mut hepatoblasts.**

Consumption and production rates of essential amino acids (isoleucine and lysine) and non-essential amino acids (alanine, glutamine, glutamate, glycine, tyrosine and t-methylhistadine) in WT, DBD Mut



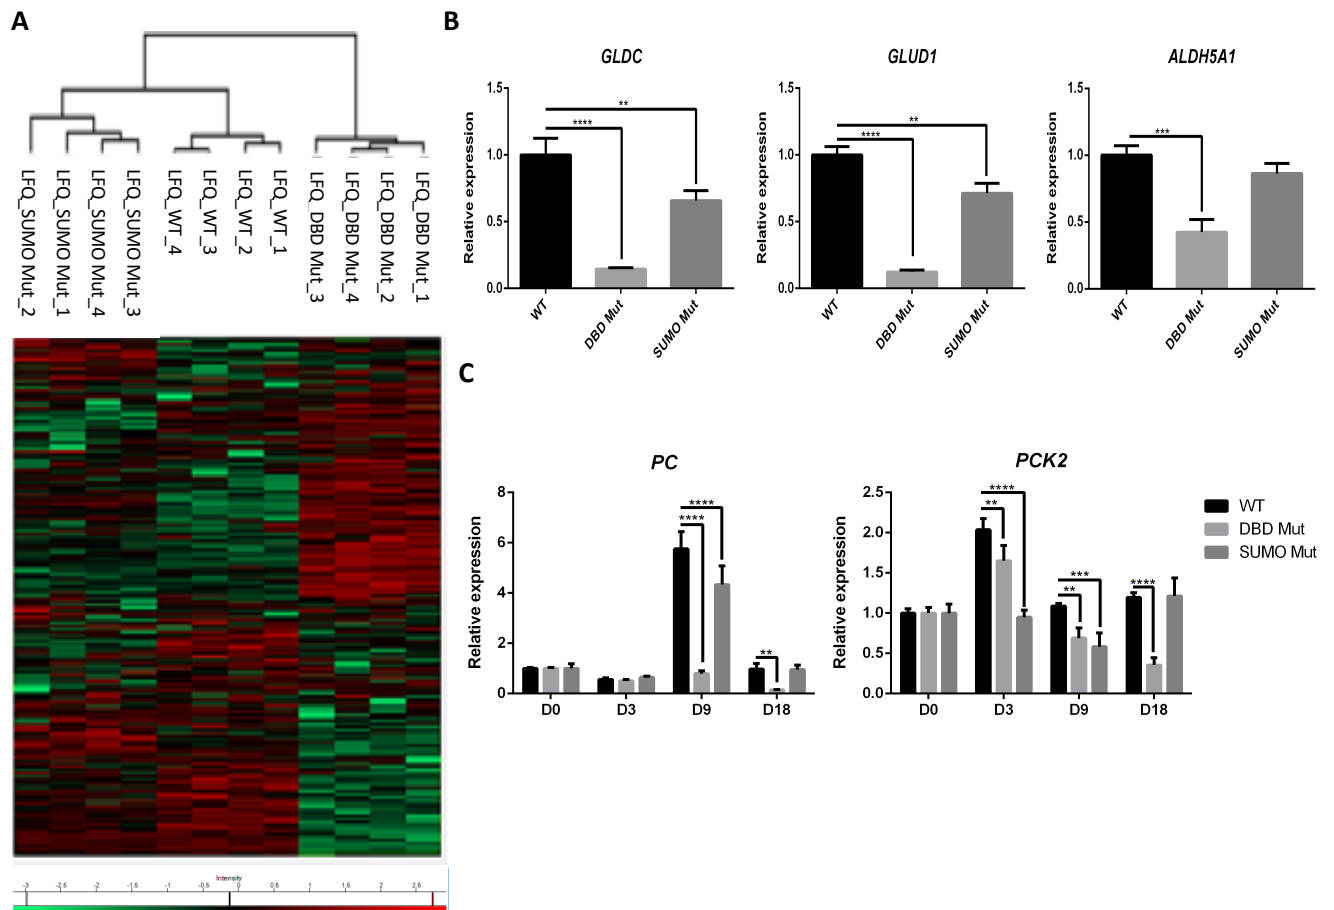

### Supplemental Figure 5

#### Figure S5. Related to Figure 5, Heat map representation of the proteomics dataset and the expression of representative metabolic enzymes.

(A) Heat map of proteomics analysis of the WT, DBD Mut and SUMO Mut cells at the hepatic progenitor stage. The LFQ intensities were log<sub>10</sub> transformed, then z-scored and normalized by row. (B) The expression of metabolic enzymes *GLDC*, *GLUD1* and *ALDH5A1* at mRNA level in the progenitor stage cells. Data were normalized to the housekeeping gene *ACTB* and expressed relative to the WT cells. The results shown represent three biological replicates and error bars represent SD. \*\* $p < 0.01$ , \*\*\*  $p < 0.001$ , \*\*\*\*  $p < 0.0001$ ; one-way ANOVA with Tukey post hoc test. (C) The expression of *PC* and *PCK2* throughout hepatic differentiation process. Data were normalized to the housekeeping gene *ACTB* and expressed relative to day 0 cells. The results shown represent three biological replicates and error bars represent SD. \*\* $p < 0.01$ , \*\*\*  $p < 0.001$ , \*\*\*\*  $p < 0.0001$ ; two-way ANOVA with Tukey post hoc test.

| <b>gRNA name</b>         | <b>Sequence (5'-3')</b>                      |
|--------------------------|----------------------------------------------|
| HNF4 $\alpha$ -KO-g1-F   | caccGCTAGAGAAAGCTGGGGCTCG                    |
| HNF4 $\alpha$ -KO-g1-R   | aaacCGAGCCCCAGCTTTCTCTAGC                    |
| HNF4 $\alpha$ -KO-g2-F   | caccGAACCTGGCCACCTTCTGGGG                    |
| HNF4 $\alpha$ -KO-g2-R   | aaacCCCCAGAAGGTGGCCAGGTTC                    |
| HNF4 $\alpha$ -KO-g3-F   | caccGCCCAGAGACAGCTGCCCTTC                    |
| HNF4 $\alpha$ -KO-g3-R   | aaacGAAGGGCAGCTGTCTCTGGGC                    |
| HNF4 $\alpha$ -KO-g4-F   | caccGTCAGGGAGAAGACAGACCTT                    |
| HNF4 $\alpha$ -KO-g4-R   | aaacAAGGTCTGTCTTCTCCCTGAC                    |
| HNF4 $\alpha$ -Kin-g11-F | caccGTGCAACAGTTGTCAATCT                      |
| HNF4 $\alpha$ -Kin-g11-R | aaacAGATTGACAACCTGTTGCAC                     |
| HNF4 $\alpha$ -Kin-g12-F | caccGGGAGGTCCGTGCCAAGCCC                     |
| HNF4 $\alpha$ -Kin-g12-R | aaacGGGCTTGGCACGGACCTCCC                     |
|                          |                                              |
| <b>Name</b>              | <b>Sequence (5'-3')</b>                      |
| 5-HA-F                   | gagctcgtttaaacggcgccGCTTGAACCCAGGAGGCA       |
| 5-HA-R                   | gcaatatttcaagaatgcaTAAACTGAATCTGCTCGATCATCTG |
| 3-HA-F                   | gattatcttctagggttaacGCTCTTCGGCATGGCTAG       |
| 3-HA-R                   | cggcccgcccttaattaaTCTCAGGAATCTGCAATTCAC      |

**Table S5. Related to Figure 1, gRNA names and sequences (top panel) and primer names and sequences used in Gibson assembly.**

| <b>Name</b>     | <b>Sequence (5'-3')</b>    |
|-----------------|----------------------------|
| T7E1-KO-F       | CCTGGTCCCTTGGCAAGAACT      |
| T7E1-KO-R       | AAGACGGGCTCATCTACTGAGGC    |
| T7E1-Kin-F      | TTGCCACCCTCTTCCATTGT       |
| T7E1-Kin-R      | CACTTCAGAGAGGTCTCCTGTGGC   |
|                 |                            |
| <b>Name</b>     | <b>Sequence (5'-3')</b>    |
| targeting-LA-F1 | CTATGCATGGTGCTAGGTGG       |
| targeting-LA-R1 | CATTTTGA CTCACGCGGTTCG     |
| targeting-LA-R2 | TCTCAGGAATCTGCAATTCACCTC   |
| targeting-RA-F1 | CAGGTGCAGGTGAGCTTGGAGG     |
| targeting-RA-F2 | CAGACCGATAAAACACATGCG      |
| targeting-RA-R1 | GGATCTCTGAGGTCACCCCTCACTAC |

**Table S6. Related to Figure 1, Primer names and sequences (top panel) used in T7EI assay and primer names and sequences used in screening of knock-in clones.**

| <b>Immunostaining Antibody Name</b> | <b>Host</b> | <b>Dilution</b> | <b>Supplier</b> |
|-------------------------------------|-------------|-----------------|-----------------|
| <b>Primary antibodies</b>           |             |                 |                 |

|                             |             |       |                   |
|-----------------------------|-------------|-------|-------------------|
| OCT4                        | Rabbit Poly | 1/200 | Abcam             |
| NANOG                       | Goat Poly   | 1/200 | Abcam             |
| AFP                         | Mouse Mono  | 1/500 | Abcam             |
| SOX17                       | Goat Poly   | 1/500 | R & D Systems     |
| HNF4 $\alpha$               | Rabbit Poly | 1/100 | Santa Cruz        |
| IgG                         | Mouse       | 1/400 | DAKO              |
| IgG                         | Rabbit      | 1/400 | DAKO              |
| IgG                         | Goat        | 1/400 | DAKO              |
| <b>Secondary antibodies</b> |             |       |                   |
| Anti-Mouse 488              | Rabbit      | 1/400 | Life Technologies |
| Anti-Mouse 568              | Goat        | 1/400 | Life Technologies |
| Anti-Rabbit 488             | Donkey      | 1/400 | Life Technologies |
| Anti-Rabbit 568             | Donkey      | 1/400 | Life Technologies |
| Anti-Goat 488               | Rabbit      | 1/400 | Life Technologies |
| Anti-Goat 568               | Rabbit      | 1/400 | Life Technologies |

| Flow Antibody | Conjugated | Type      | Dilution | Supplier  |
|---------------|------------|-----------|----------|-----------|
| SSEA-1        | FITC       | Mouse IgM | 1/50     | Biolegend |
| SSEA-4        | PE         | Mouse IgG | 1/50     | Biolegend |
| TRA-1-60      | PE         | Mouse IgM | 1/50     | Biolegend |

| Western Blot Antibody       | Host        | Dilution | Supplier      |
|-----------------------------|-------------|----------|---------------|
| <b>Primary antibodies</b>   |             |          |               |
| HNF4 $\alpha$               | Rabbit Ploy | 1/1000   | Santa Cruz    |
| b-actin                     | Mouse Mono  | 1/10000  | Sigma         |
| <b>Secondary antibodies</b> |             |          |               |
| Anti-Rabbit IgG HRP         | Swine       | 1/3000   | R & D Systems |
| Anti-Mouse IgG HRP          | Goat        | 1/3000   | R & D Systems |

**Table S7. Related to Figure 1 and 2, Optimised antibody concentrations used in immunostaining, flow cytometry and western blotting.**

| <b>Gene name</b> | <b>Probe number</b>  |
|------------------|----------------------|
| HNF4 $\alpha$    | <u>Hs01023298 m1</u> |
| HNF1 $\alpha$    | <u>Hs00167041 m1</u> |
| TTR              | <u>Hs00174914 m1</u> |
| APOA2            | <u>Hs00155788 m1</u> |
| APOA4            | <u>Hs00166636 m1</u> |
| HMGCS1           | <u>Hs00266810 m1</u> |
| HMGCS2           | <u>Hs00985427 m1</u> |
| LAMB3            | <u>Hs00165078 m1</u> |
| FGA              | <u>Hs00241027 m1</u> |
| FOXA2            | <u>Hs00232764 m1</u> |
| SOX17            | <u>Hs00751752 s1</u> |
| AFP              | <u>Hs01040607 m1</u> |
| CEBPA            | <u>Hs00269972 s1</u> |
| GLDC             | <u>Hs01580591 m1</u> |
| GLUD1            | <u>Hs03989560 s1</u> |
| ALDH5A1          | <u>Hs00542449 m1</u> |
| PC               | <u>Hs00559398 m1</u> |
| PCK2             | <u>Hs00356436 m1</u> |
| ACTB             | <u>Hs01060665 g1</u> |

**Table S8. Related to Figure 2 and 4, TaqMan probes used in qPCR.**



## TRANSPARENT METHODS

Detailed methods are provided in the online version of this paper and include the following:

- **KEY RESOURCES TABLE**
- **CONTACT FOR REAGENTS AND SOURCE SHARING**
- **EXPERIMENTAL MODEL AND SUBJECT DETAILS**
  - Cell lines
  - Cell Culture Conditions
  - Hepatocyte Differentiation System
- **METHOD DETAILS**
  - CRISPR/Cas9n-sgRNA expression plasmids and targeting vector construction
  - Nucleofection of H9 cells
  - Selection of the nucleofected cells
  - Genotyping the single cell-derived colonies
  - Removal of the transposon in the HNF4 $\alpha$  point mutation knock-in experiment
  - Immunostaining
  - Flow cytometry
  - Western blotting
  - ELISA quantification
  - CYP3A assay
  - <sup>1</sup>H NMR-based metabolomics analysis
  - Microarray analysis
  - Label-free LC-MS/MS proteomics analysis
- **QUANTIFICATION AND STATISTICAL ANALYSIS**
  - Metabolomics data analysis
  - Microarray data processing and visualization
  - Gene set enrichment analysis (Gene Ontology)
  - Label-free proteomics data analysis
  - Visualization of over-layered analysis of microarray and proteomics datasets
- **DATA AND SOFTWARE AVAILABILITY**

### KEY RESOURCES TABLE

| REAGENTS or RESOURCES | SOURCE      | IDENTIFIER |
|-----------------------|-------------|------------|
| <b>Antibodies</b>     |             |            |
| Human NANOG antibody  | R&D systems | AF1997     |
| Human OCT4 antibody   | Abcam       | AB19857    |
| Human SOX17 antibody  | R&D systems | AF1924     |
| Anti-Human SSEA4 PE   | eBioscience | 12-8843-42 |

|                                                                                 |                          |             |
|---------------------------------------------------------------------------------|--------------------------|-------------|
| Anti-Human CD15(SSEA1) FITC                                                     | eBioscience              | 11-0159-42  |
| Anti-Human TRA-1-60 PE                                                          | eBioscience              | 12-8863-82  |
| HNF4 $\alpha$ (H-171)                                                           | SantaCruz                | Sc-8987     |
| Monoclonal anti-AFP antibody                                                    | Sigma                    | A8452       |
| Monoclonal anti- $\beta$ -ACTIN                                                 | R&D systems              | A5441       |
| Mouse IgM isotype control FITC                                                  | eBioscience              | 11-4752-80  |
| Mouse IgG3 isotype control PE                                                   | eBioscience              | 12-4742-41  |
| Polyclonal Swine Anti-Rabbit Immunoglobulins HRP                                | DAKO                     | P0399       |
| Polyclonal Goat Anti-Mouse Immunoglobulins HRP                                  | DAKO                     | P0447       |
| Donkey anti-Goat IgG (H+L) Cross-Adsorbed, Alexa Fluor <sup>®</sup> 568         | Thermo Fisher Scientific | A11057      |
| Goat anti-Rabbit IgG (H+L) Cross-Adsorbed, Alexa Fluor <sup>®</sup> 488         | Thermo Fisher Scientific | A11008      |
| Donkey anti-Mouse IgG (H+L) Highly Cross-Adsorbed, Alexa Fluor <sup>®</sup> 488 | Thermo Fisher Scientific | A21202      |
| 4',6-Diamidine-2'-phenylindole dihydrochloride (DAPI)                           | Roche                    | 10236276001 |
| Mouse IgG                                                                       | Vector Laboratories      | I-2000      |
| Rabbit IgG                                                                      | Vector Laboratories      | I-1000      |

|                                                                  |                                 |            |
|------------------------------------------------------------------|---------------------------------|------------|
| Goat IgG                                                         | Vector Laboratories             | I-5000     |
| <b>Bacterial and Virus Strains</b>                               |                                 |            |
| One Shot TOP10 Chemically Competent <i>E. coli</i>               | Thermo Fisher Scientific        | C404003    |
| One Shot Stbl3 chemically competent <i>E. coli</i>               | Thermo Fisher Scientific        | C7373-03   |
| <b>Plasmid Constructs</b>                                        |                                 |            |
| pSpCas9n(BB)-2A-Puro (PX462)                                     | Addgene                         | PX462      |
| pMCS-AAT_PB-PGKpuroTK                                            | Wellcome Trust Sanger Institute | N/A        |
| pCMV-hyPBase                                                     | Wellcome Trust Sanger Institute | N/A        |
| pMD19-T vector                                                   | Takara                          | 3271       |
| <b>Chemicals, Peptides, and Recombinant Proteins</b>             |                                 |            |
| Matrigel matrix                                                  | Corning                         | 354248     |
| Human Recombinant Laminin 521                                    | BioLamina                       | LN521      |
| Human Recombinant Laminin 111                                    | BioLamina                       | LN111      |
| Recombinant Human/Murine/Rat Activin A ( <i>E. coli</i> derived) | Peprtech                        | 120-14E    |
| Recombinant Mouse Wnt-3a Protein                                 | R&D systems                     | 1324-WN/CF |
| Recombinant Human HGF                                            | Peprtech                        | 100-39     |
| Recombinant Human Oncostatin M                                   | Peprtech                        | 300-10     |

|                                             |                          |           |
|---------------------------------------------|--------------------------|-----------|
| B27 minus vitamin A                         | Thermo Fisher Scientific | 12587-010 |
| RPMI 1640                                   | Thermo Fisher Scientific | 11875-093 |
| Penicillin-Streptomycin                     | Thermo Fisher Scientific | 15140-122 |
| Knockout DMEM                               | Thermo Fisher Scientific | 10829-018 |
| Knockout serum replacement                  | Thermo Fisher Scientific | 10828-028 |
| GlutaMAX                                    | Thermo Fisher Scientific | 35050-038 |
| NEAA                                        | Thermo Fisher Scientific | 11140-035 |
| DMSO                                        | Honeywell Chemicals      | D5879     |
| Beta-mecaptoethanol                         | Thermo Fisher Scientific | 31350-010 |
| HepatoZYME-SFM                              | Thermo Fisher Scientific | 17705-021 |
| Hydrocortisone-21 hemisuccinate sodium salt | Sigma                    | H4881     |
| mTeSR1 medium                               | Stem Cell Technologies   | 85850     |
| Gentle Cell Dissociation Reagent            | Stem Cell Technologies   | 07174     |
| TrypLE Express Enzyme                       | Thermo Fisher Scientific | 12604013  |
| Y-27632 (Dihydrochloride )                  | Millipore                | SCM075    |
| DPBS                                        | Thermo Fisher Scientific | 14190144  |

|                                                    |                          |              |
|----------------------------------------------------|--------------------------|--------------|
| DPBS with calcium and magnesium                    | Thermo Fisher Scientific | 14040133     |
| Bovine Serum Albumin                               | Sigma                    | A7906-10G    |
| OneComp eBeads 100 tests                           | eBioscience              | 01-1111-42   |
| Trypan Blue Solution, 0.4%                         | Thermo Fisher Scientific | 15250061     |
| NuPAGE 4-12% Bis-Tris Protein Gels, 1.5mm, 10-well | Thermo Fisher Scientific | NP0335BOX    |
| NuPAGE MES SDS Running Buffer (20x)                | Life Technologies        | NP0002       |
| NuPAGE Transfer Buffer (20x)                       | Life Technologies        | NP0006-1     |
| NuPAGE LDS Sample Buffer                           | Thermo Fisher Scientific | NP0007       |
| SeeBlue Plus 2 Prestained Standard                 | Thermo Fisher Scientific | LC5925       |
| TWEEN 20                                           | Sigma                    | T2700-100ML  |
| Phosphate buffered saline tablet                   | Sigma                    | P4417-100TAB |
| SYBR Safe DNA gel stain                            | Life Technologies        | S33102       |
| UltraPure Agarose                                  | Life Technologies        | 16500-100    |
| DNA ladder, 1 kb                                   | New England BioLabs      | N3232S       |
| UltraPure DNase/RNase-free distilled water         | Life Technologies        | 10977-023    |
| Ampicillin                                         | Sigma                    | A9518-5G     |
| SOC medium                                         | New England BioLabs      | B9020S       |
| LB medium                                          | Sigma                    | L3022        |
| LB agar medium                                     | Sigma                    | L2897        |
| FIAU                                               | Moravek                  | M251         |

|                                                   |                             |           |
|---------------------------------------------------|-----------------------------|-----------|
| Puromycin dihydrochloride                         | Life Technologies           | A11138-03 |
| FastDigest BbsI (Bpil)                            | Fermentas/Thermo Scientific | FD1014    |
| DTT                                               | Fermentas/Thermo Scientific | R0862     |
| T4 DNA ligase and buffer                          | New England BioLabs         | M0202S    |
| T4 polynucleotide kinase                          | New England BioLabs         | M0201S    |
| Adenosine 5'-triphosphate, 10 mM                  | New England BioLabs         | P0756S    |
| Q5 High-Fidelity DNA Polymerases                  | New England BioLabs         | M0491     |
| T7 endonuclease I (T7EI)                          | New England BioLabs         | M0302S    |
| NsiI-HF                                           | New England BioLabs         | R3127S    |
| AscI                                              | New England BioLabs         | R0558S    |
| HpaI                                              | New England BioLabs         | R0105S    |
| PacI                                              | New England BioLabs         | R0547S    |
| TRIzol Reagent                                    | Thermo Fisher Scientific    | 15596026  |
| <b>Critical Commercial Assays</b>                 |                             |           |
| Human stem cell Nucleofactor kit 1                | Lonza                       | VPH-5012  |
| P450-Glo™ CYP3A4 Assay System                     | Promega                     | V8902     |
| Human Alpha Fetoprotein (AFP) ELISA Kit, 96 tests | Alpha Diagnostic            | 0500      |

|                                                                                      |                          |           |
|--------------------------------------------------------------------------------------|--------------------------|-----------|
| Human Serum Albumin ELISA Kit, 96 tests                                              | Alpha Diagnostic         | 1190      |
| GenElute Mammalian Genomic DNA miniprep Kit                                          | Sigma                    | G1N70-1KT |
| Pierce BCA Protein Assay Kit                                                         | Thermo Fisher Scientific | 23225     |
| SuperSignal West Pico Chemiluminescent Substrate                                     | Thermo Fisher Scientific | 34077     |
| QIAprep spin miniprep kit                                                            | Qiagen                   | 27106     |
| QIAquick gel extraction kit                                                          | Qiagen                   | 28704     |
| GeneChip Human Genome HG-U133 Plus 2.0 Array                                         | Affymetrix               | N/A       |
| <b>Experimental Models: Cell Lines</b>                                               |                          |           |
| H9 female human ESCs                                                                 | WiCell                   | WA09      |
| H9 with HNF4 $\alpha$ truncated                                                      | This study               | N/A       |
| H9 with HNF4 $\alpha$ point mutated                                                  | This study               | N/A       |
| <b>Oligonucleotides</b>                                                              |                          |           |
| See Table S5, S6                                                                     | N/A                      | N/A       |
| <b>Recombinant DNA</b>                                                               |                          |           |
| gRNA for CRISPR cloned in SpCas9n(px462), see Table S5 for oligonucleotide sequences | This study               | N/A       |
| PB_HNF4 $\alpha$ _PGK puroTK                                                         | This study               | N/A       |
| <b>Software and Algorithms</b>                                                       |                          |           |

|                                                 |                                         |                                                                                                                                                         |
|-------------------------------------------------|-----------------------------------------|---------------------------------------------------------------------------------------------------------------------------------------------------------|
| Flowjo                                          | FLOWJO, LLC                             | <a href="https://www.flowjo.com/">https://www.flowjo.com/</a>                                                                                           |
| FACSDIVA software                               | BD Biosciences                          | N/A                                                                                                                                                     |
| GraphPad Prism                                  | GraphPad Software                       | <a href="https://www.graphpad.com/scientificsoftware/prism/">https://www.graphpad.com/scientificsoftware/prism/</a>                                     |
| Columbus Image Data Storage and Analysis System | PerkinElmer                             | <a href="http://www.cambridgesoft.com/ensemble/spotfire/Columbus/default.aspx">http://www.cambridgesoft.com/ensemble/spotfire/Columbus/default.aspx</a> |
| Chenomx NMR Suite version 8.1                   | Chenomx                                 | <a href="https://www.chenomx.com/software/archive/">https://www.chenomx.com/software/archive/</a>                                                       |
| Microarray Suite software                       | Affymetrix                              | N/A                                                                                                                                                     |
| Limma packages                                  | Bioconductor                            | <a href="https://bioconductor.org/packages/release/bioc/html/limma.html">https://bioconductor.org/packages/release/bioc/html/limma.html</a>             |
| MaxQuant proteomics software                    | Max Planck Institute of Biochemistry    | <a href="http://www.biochem.mpg.de/5111795/maxquant">http://www.biochem.mpg.de/5111795/maxquant</a>                                                     |
| Perseus proteomics software                     | Max Planck Institute of Biochemistry    | <a href="http://www.biochem.mpg.de/5111810/perseus">http://www.biochem.mpg.de/5111810/perseus</a>                                                       |
| Enrichr analysis website                        | Icahn School of Medicine at Mount Sinai | <a href="http://amp.pharm.mssm.edu/Enrichr/">http://amp.pharm.mssm.edu/Enrichr/</a>                                                                     |
| STRING protein interaction analysis website     | N/A                                     | <a href="https://string-db.org">https://string-db.org</a>                                                                                               |
| PaintOmics3                                     | N/A                                     | <a href="http://bioinfo.cipf.es/paintomics/">http://bioinfo.cipf.es/paintomics/</a>                                                                     |

## CONTACT FOR REAGENTS AND SOURCE SHARING

Further information and requests for resources and reagents should be directed to and will be fulfilled by the Lead Contact, David C. Hay ([davehay@talktalk.net](mailto:davehay@talktalk.net)).

## EXPERIMENTAL MODEL AND SUBJECT DETAILS

### Cell lines

H9 female human ESCs were purchased from WiCell. Cells were routinely checked for cell surface markers using flow cytometry and for the presence of mycoplasma.

### Cell Culture Conditions

H9 human ESCs and genome modified DBD Mut and SUMO Mut cell lines were cultured on Matrigel coated cell culture plates with mTeSR1 medium. Cells were routinely split in 1:3 ratio



using Gentle Cell Dissociation reagent. For nucleofection, single cells were obtained by treating the cells with Gentle Cell Dissociation reagent for 7-8 minutes at 37 °C. ROCK inhibitor was used to maintain the single cells.

### **Hepatocyte Differentiation System**

Hepatocyte differentiation of the different cell lines was carried out following lab-developed protocol (Wang et al., 2017). Briefly,  $5.5-6.5 \times 10^5$  single cells were seeded into per well on 6-well plates coated with LN521/LN111 mix (1:3) for differentiation. Once cells reached approximately 40% confluency post seeding, hepatocyte differentiation was initiated by switching the mTeSR1 medium to RPMI 1640 medium supplemented with 2 % B27 (minus Vitamin A), 100 ng/ml Activin A and 50 ng/ml Wnt 3a. This definitive endoderm induction medium was changed daily for 3 days. Subsequently, the differentiation medium was switched to Knockout DMEM medium supplemented with 20 % knockout serum replacement, 0.5 % GlutaMAX, 1% NEAA and DMSO, and 0.1 mM beta mecaptoethanol. This hepatic progenitor specification medium was changed daily for 5 days. Following this, the differentiation medium was changed to HepatoZYME medium supplemented with 1 % GlutaMAX, 10 uM hydrocortisone, 20 ng/ml hepatocyte growth factor (HGF) and 10 ng/ml oncostatin M (OSM). This hepatocyte-like cells maturation medium was changed every other day for 10 days. The derived hepatocyte-like cells were checked for functions, including basal cytochrome P450 3A activity, albumin and AFP secretion. In addition, cells at representative time points (day 0, day 3, day 9 and day 18) were routinely checked for the expression of typical markers corresponding to that time point.

## **METHOD DETAILS**

### **CRISPR/Cas9n-sgRNA expression plasmids and targeting vector construction**

Oligonucleotides for gRNAs (Table S5) targeting HNF4 $\alpha$  were annealed and cloned into a BbsI digested Cas9n backbone plasmid (PX462) following a published protocol (Ran et al., 2013).

The construction of the *piggyBac*-based targeting construct involved three main steps: the amplification of the 5'-homology arm (HA) and the 3'-HA; the insertion of the 5'-HA into the backbone plasmid; and the insertion of the 3'-HA into the backbone plasmid.

The PCR primers for amplifying 5'-HA and 3'-HA used in Gibson assembly were generated using NEBuilder (<https://nebuilder.neb.com>) (Table S5). The desired point mutations were incorporated into the primers. The PCR amplification of the two homology arms were catalysed by Q5 high-fidelity DNA polymerase (New England Biolabs). H9 genomic DNA was used as the template for the PCR. The amplified homology arms were then purified before being inserted into the backbone plasmid.

The used *piggyBac* backbone was a kind gift of Dr. Kosuke Yusa from the Wellcome Trust Sanger Institute, UK. For the insertion of the 5'-HA, the backbone plasmid was digested using NsiI and AscI enzymes and then gel purified. The purified 5'-HA was then inserted using a Gibson assembly reaction. The *piggyBac*-5'-HA plasmid was then purified and sequenced to confirm the correct insertion of the 5'-HA. Following this, the *piggyBac*-5'-HA plasmid was digested using HpaI and PacI enzymes and then purified, the 3'-HA was then inserted into the

backbone and completed the construction of the donor plasmid. Sequencing was also performed to confirm the correct insertion of the 3'-HA.

### **Nucleofection of H9 cells**

H9 cells at 70-80 % confluency were dissociated using Gentle Cell Dissociation reagent to make single cell suspension. For HNF4 $\alpha$  gene knockout, ~ 0.8 million live cells were nucleofected with 3  $\mu$ g of each Cas9n-sgRNA expression plasmid. For the knockin experiment, ~ 0.8 million cells were nucleofected with 5  $\mu$ g donor plasmid and 3  $\mu$ g of both Cas9n-sgRNA expression plasmids. The Human Stem Cell Nucleofector<sup>®</sup> Kit 1 (Lonza) was used and the nucleofection was facilitated by a Nucleofector 2b device with program A-023 (Lonza).

### **Selection of the nucleofected cells**

48 hours post nucleofection, the cells were selected using 0.5  $\mu$ g/ml puromycin for 2 days. Puromycin-resistant cells were then propagated and passaged to 10-15 96-well plates at the concentration of 0.8 cell/well in mTeSR1 medium supplemented with 10  $\mu$ M Rho-associated protein kinase (ROCK) inhibitor (Sigma-Aldrich). At this point, puromycin in the medium for HNF4 $\alpha$  knockout experiment cells was removed, but it was kept for selecting cells for HNF4 $\alpha$  point mutation knock-in experiment. Following the seeding, the cells were maintained at 37 °C with 10 % CO<sub>2</sub> for 7 days to form single cell-derived colonies.

The single-cell derived colonies were picked at about another 5 days later and passaged at a 1:2 ratio to two different plates. ~4 days after the passaging, cells on one plate were lysed for genomic DNA extraction.

### **Genotyping the single cell-derived colonies**

Colonies from HNF4 $\alpha$  knockout experiments were analysed using T7E1 assay (Table S6). The targeted region was PCR amplified and the PCR products were then digested using T7E1 enzyme, and subsequently separated on agarose gels and the genotypes were 'readable' on the gel.

Colonies from HNF4 $\alpha$  point mutation knock-in experiments were amplified using three-primer PCRs (Table S6) to differentiate genomic sequences and inserted sequences. The PCR products were separated on agarose gels and the genotype were 'readable' on the gel.

For promising colonies from the DNA gel-based genotyping, the PCR products were purified and then inserted into a pMD19-T vector to form a stable plasmid for sequencing. The colonies with correct genotypes were then saved and expanded to form stable isogenic cell lines.

### **Removal of the transposon in the HNF4 $\alpha$ point mutation knock-in experiment**

The correctly targeted colonies were established and two were used for the removal of the selection cassette introduced by the transposon. Briefly, ~0.8 million cells were nucleofected with 5  $\mu$ g hyperactive PBase (gift from Dr. Kosuke Yusa) and the cells were culture in mTeSR1 medium without puromycin. The cells were then maintained for 3-4 passages before the negative selection mediated by the thymidine analog 1-(2-deoxy-2-fluoro- $\beta$ -D-arabinofuranosyl)-5-iodouracil (FIAU) at a concentration of 200 nM. About 2 weeks after the

negative selection, single cell-derived colonies were picked and genotyped as described above.

### **Immunostaining**

Cells were fixed in 100 % ice-cold methanol at -20 °C for 30 minutes. Post fixation, cells were washed three times with DPBS for 5 minutes at room temperature. The cells were subsequently blocked with PBS-0.1 % Tween (PBST) containing 10 % BSA for 1 hour at room temperature. After that, the blocking solution was removed and the respective primary antibody diluted in 1% BSA/PBST was added to the cells. The primary antibody was incubated at 4 °C overnight with gentle agitation. Following this, the used primary antibody solution was removed and the cells were washed three times with PBST for 5 minutes at room temperature. The cells were then incubated with the appropriate secondary antibody diluted in PBST for 1 hours at room temperature in the dark with gentle agitation. The cells were then washed three times with PBST. Following this, cells were stained with DAPI diluted in PBS (1:5000) for 2 minutes at room temperature. The DAPI solution was then removed and the cells were washed twice with PBST. In all cases, the stained cells were stored at 4 °C in the dark before imaging. The primary and secondary antibodies are listed in supplemental Table S7.

All images were collected at room temperature using the automated Operetta fluorescent microscope. The images were processed using Columbus Image analysis server.

### **Flow cytometry**

Fluorescence activated cell sorting (FACS) was used to confirm the expression of cell surface markers in hESCs. hESCs from a well on a 6-well plate were washed once with 2 ml DPBS and then dissociated with 1ml TrypLE. The cells were lifted off as single cells and collected. Post centrifugation, cells were resuspended in DPBS and filtered through a 0.22 µm filter. The single cell suspension was then incubated with the fluorochrome conjugated antibodies and the corresponding IgG controls for 30 minutes at 4 °C. The antibody information is listed in supplemental Table S7. Cells were then washed twice with DPBS, removing any unbound antibody, and span down at 200 x g for 5 minutes. Following this, cells were resuspended in 300 µl of DPBS.

Dead cells and debris were not included in the analysis. This was carried out by using an electronic live gate on forward scatter and side scatter parameters. Data for 20,000-50,000 'live' events were acquired for each sample using a BD LSR Fortessa (4 laser) analyser. The data was analysed using FlowJo software.

### **Western blotting**

Cells at different time points were washed once with DPBS and lysed in wells at room temperature in dark for 5 min. 200 µl home-made SUMO lysis buffer (2 % SDS, 50 mM Tris-HCL (pH 8.0), 1 mM EDTA, 10 mM iodoacetamide) supplemented with proteinase and phosphatase inhibitors (Sigma-Aldrich) at 1 % final concentration was used for each well of a 6-well plate. The cell extract was briefly sonicated using a Bioruptor (Diagenode) and span down for 15 min at 12,000 rpm at 4 °C. The protein supernatant was then transferred to a new 1.5 ml Eppendorf tube.

The Pierce bicinchoninic acid (BCA) assay kit (Thermo Fisher Scientific) was used to quantify the protein concentration. Protein supernatant was diluted 1:10 using the lysis buffer. 20  $\mu$ l protein supernatant of each sample was analysed in duplicates. Reagent A and B from the kit were mixed at a 1:50 ratio and a volume of 200  $\mu$ l was transferred into each sample well. A standard curve was generated using the bovine serum albumin standards at concentrations ranging from 0-2000  $\mu$ g/ml. The plate was incubated at room temperature for 30 min and the absorbance was read at 562 nm. The protein concentrations were calculated by linear extrapolation using the standard curve generated.

The SDS-NuPAGE polyacrylamide gel electrophoresis (SDS-PAGE) was used to separate proteins of different sizes. 50  $\mu$ g protein supernatant was denatured at 100 °C for 10min in 1x NuPAGE LDS sample buffer supplemented with 10 mM DTT before being used for electrophoresis. 4-12 % Bis-Tris precast polyacrylamide gels (Thermo Fisher Scientific) were used with the XCell SureLock Mini-Cell System (Thermo Fisher Scientific) for the electrophoresis. Once the gel was fitted in the chamber, the tank was filled with 1x NuPAGE MES-SDS running buffer with 0.5 ml of NuPAGE Antioxidant (Thermo Fisher Scientific) added into the inner chamber. The samples were loaded along with a SeeBlue Plus 2 Pre-Stained Standard (Invitrogen). A current of 200 V was applied and the samples were run for 1-2 hours depending on the purpose of each experiment. The gels containing proteins were carefully removed from the cassette and were used in western blotting.

Following the protein separation using SDS-PAGE gels, the proteins were then transferred from the gels to the Polyvinylidene fluoride (PVDF) membrane. The transfer sack was assembled in the following order from cathode to anode: 3x sponge; 2x filter paper soaked in 1x NuPAGE Transfer Buffer; SDS-PAGE gel; PVDF membrane activated in 100 % ice-cold methanol; 2x filter paper soaked in 1x NuPAGE Transfer Buffer; 3x sponge. No bubbles between the gel and the membrane were allowed. Once the sack was assembled and placed into the XCell Blot II module, the module was then tightly sealed and placed into the transfer SureLock tank containing 1x transfer buffer in the inner chamber and ice-cold water in the outer chamber. The tank was then placed on ice for the entire protein transfer process. A constant current of 160mA was applied for 90-120 min.

Once the proteins were successfully transfer onto the PVDF membrane, the membrane was blocked in 10 % skimmed milk at room temperature with gentle agitation for at least one hour to prevent non-specific antibody binding.

Following this, the membrane was probed with desired primary antibody diluted in 5 ml 10 % BSA/PBST at 4 °C overnight with gentle rolling. The dilution ratios were optimised specifically for each primary antibody and were listed in Table 4. Unbound antibody was removed by three, 5-min washes with adequate 0.1 % PBST at room temperature with agitation. The primary antibody could be re-used for 2-3 times if stored at 4 °C properly.

After probed with the primary antibody, the membrane was then incubated with corresponding horseradish peroxidase (HRP)-conjugated secondary antibody diluted in 5 ml 10 % skimmed milk at room temperature for at least one hour with gentle rolling. Unbound secondary antibody was then removed by three, 5-min washes with adequate 0.1 % PBST at

room temperature with agitation. The primary and secondary antibody information is listed in supplemental Table S7.

The proteins of interest were then detected using enhanced chemiluminescence (ECL). Proteins bands were visualised using the Pierce Enhanced Chemiluminescence Kit (Pierce, UK). Peroxidase buffer and the Luminol/Enhancer solution was mixed at a 1:1 ratio and spread evenly onto the membrane (2 ml for each membrane), followed by a 5-min incubation at room temperature. The HRP substrate reacts with the conjugated HRP group presented on the secondary antibody, specifying the target protein. The membrane was developed in the dark room using a film developer.

### **ELISA quantification**

At the hepatocyte stage, day 18 cell culture supernatants were collected. Albumin and AFP concentration were determined using commercially available kits (Alpha Diagnostic Intl. Inc, San Antonio, USA). The ELISA assay was performed according to the manufacturer's instructions with cell culture supernatants diluted at 1:3 (albumin) or 1:10 (AFP). After one hour incubation at room temperature, the wells were washed for four times and anti-human albumin or AFP HRP-conjugated secondary antibodies were added to the wells for 30 minutes. Subsequently, the wells were washed five times and the substrate was then added and incubated for a further 15 minutes in the dark at room temperature. Following this, the stop solution was added directly to the wells in order to stop the enzymatic reaction. The plates were then read at 450 nm with a reference wavelength of 630nm using a FLUOstart Omega plate reader (BMG LabTech, Germany). Blank cell culture media incubated at 37 °C for 48 hours, diluted in 1:3 or 1:10 was used as a negative control. The data was then normalised to per ml per 48 hours per mg protein as determined by BCA assay (Pierce, UK).

### **Quantitative real-time PCR**

Total RNA was collected from cells using TRIzol reagent (Invitrogen) according to the manufacturer's instructions. Total RNA was reverse transcribed using QuantiTect reverse-transcription kit (Qiagen) following the manufacturer's protocol. Real-time PCR was performed using TaqMan Fast Universal Master Mix and appropriate Taqman probes (Applied Biosystems). The primers are listed in supplemental Table S8. The samples were analysed using Roche LightCycler 480 Real-Time PCR System. Results were normalized to beta-actin. The qPCRs were run in triplicates.

### **CYP3A assay**

Day 18 hESC-derived hepatocyte-like cells (HLCs) were incubated with the luciferin conjugated CYP3A (1:40) substrate (P450 P-Glo Luminescent Kit, Promega, UK) diluted in the maturation medium for 5 hours at 37 °C. Blank cell culture medium was used as a negative control. The supernatants were then collected and tested for luminescence. The luciferin detection reagent was reconstituted by mixing the buffer with the lyophilised luciferin detection reagent. 50 µl of the collected supernatant was mixed with 50 µl of the detection reagent in a white 96 well plate and incubated at room temperature in the dark for 20 minutes. The relative levels of basal activity were measured using a luminometer (POLARstar optima). Units of activity were recorded as relative light units per ml per mg protein (RLU/ml/mg) as normalised by protein content.

### **<sup>1</sup>H NMR-based metabolomics analysis**

24-hour cell culture medium from cells at differentiation day 9 was collected. The medium was then centrifuged at 4 °C, 300 x g for 5 min. The supernatant was collected and flash-frozen on dry ice.

All media samples were analysed on a 700 MHz Bruker Avance Neo NMR spectrometer equipped with a BBI room temperature probe. The aliquots of the conditioned media from each cell line and unconditioned controls were thawed at room temperature and 550 µL of each was transferred into a microcentrifuge tube, to this 50 µL of deuterium oxide containing 1 mM deuterated 3-(Trimethylsilyl)-1-propanesulfonic acid-d6 sodium (DSS-d6, 98% atom %D, Sigma-Aldrich), which was used as an internal reference for calibration, was added. The total volume of 600 µL was transferred into individually coded sample tubes in 96-racks (Bruker).

Briefly, the samples were loaded using a SampleJet sample changer. The samples remained chilled at 277 K on the sample changer and at 300 K during acquisition of the <sup>1</sup>H NMR experiments. Matching, tuning and shimming were performed automatically on each individual sample to reduce sample-to-sample variation. <sup>1</sup>H NMR spectra were collected using a standard 1D-nuclear overhauser enhancement spectroscopy (NOESY)-presaturation and THE PROJECT-Carr-Purcell-Meiboom-Gill (CPMG) pulse sequences. The RF field strength for presaturation was 25Hz. For both experiments 8 scans were collected with a spectral width of 20 ppm, an acquisition time of 3.0 s and a relaxation delay of 40.0 s, which was determined from T1 measurements. The value of O1 was determined automatically for the first 1D-NOESY experiment and was used subsequently for the CPMG experiment. The total CPMG period was 64 ms with 180° every 400 µs. For both experiments a signal-to-noise ratio of greater than 100:1 was achieved. A range of metabolites were identified with the aid of the software Chenomx NMR Suite version 8.1 (Chenomx Inc, Edmonton, Alberta) and human metabolome database (HMDB).

### **Microarray analysis**

Cells at differentiation day 9 on Laminin 521/111 mix (1:3 ratio) were lysed in TRIZOL and stored at -80 °C. RNA extraction was performed according to the manufacturer's instructions. Analysis of gene expression was performed using Affymetrix GenChip Human Genome HG-U133 plus 2.0 array (Santa Clara, CA, USA). Microarrays were scanned with an Affymetrix scanner controlled by Affymetrix Microarray Suite software.

### **Label-free LC-MS/MS proteomics analysis**

To facilitate whole proteome analysis of the three lines, quadruplicate samples of WT, DBD Mut and SUMO Mut cells were taken at differentiation day 9. Total protein extract was prepared in 1x LDS sample buffer, and 20 µg total protein for each sample was sonicated and boiled for 10 minutes prior to fractionation by NuPAGE 10% Bis-Tris gels using 3-(N-morpholino) propanesulfonic acid (MOPS) buffer. Each lane of the gel was excised into 4 slices, and peptides were prepared in parallel by in-gel tryptic digestion (Shevchenko et al., 2007). For each sample, approximately 1µg total peptide was submitted for liquid chromatography coupled tandem MS (LC-MS/MS) analysis on a Q Exactive mass spectrometer (Thermo Scientific) coupled to an EASY-nLC 1000 liquid chromatography system (Thermo Scientific). Peptides were fractionated on a 75 µm x 500 mm EASY-Spray column (Thermo

Scientific) using a 90-minute gradient. Precursor ion full scan spectra were acquired over ( $m/z$  300 to 1,800) with a resolution of 70,000 at  $m/z$  200 (target value of 1,000,000 ions, maximum injection time 20 ms). Up to ten data dependent MS2 spectra were acquired with a resolution of 35,000 at  $m/z$  200 (target value of 1,000,000 ions, maximum injection time 120 ms). Ions with unassigned, +1 and +8 charge state were rejected. Intensity threshold was set to  $2.1 \times 10^4$  units. Peptide match was set to preferred, dynamic exclusion duration 40 s.

## QUANTIFICATION AND STATISTICAL ANALYSIS

### Metabolomics data analysis

The metabolic rate for each metabolite was quantified by normalizing the signal intensity against the cell number at the detected time point. The unit for the metabolic rate is then recorded as rate of integral area per cell. A negative rate indicates consumption, while a positive value means production of the metabolite. All samples were tested in triplicates.

### Microarray data processing and visualization

Affymetrix gene expression data were pre-processed using 'affyPLM' packages of the Bioconductor Software (Gentleman et al., 2004). To obtain the genes with the strongest evidence of differential expression, a linear model fit was applied for each gene using 'limma' (Linear Models for Microarray Data) packages of the Bioconductor Software.

Gene expression levels in each HNF4 $\alpha$ -edited cell line were log<sub>2</sub> transformed and then compared to the wild type control cells. Genes with a fold change greater than two over the wild type cell expression levels ( $p$  value  $\leq 0.05$ , false discovery rate (1% FDR) corrected) were taken as significantly deregulated (Table S1). All samples were tested in triplicates. Processing and visualization (Principal Component Analysis) of data were performed using MATLAB tools (The MathWorks Inc., Natick, MA, USA).

### Gene set enrichment analysis (Gene Ontology)

Genes which showed change of equal to or more than 2-fold were subjected to gene ontology (GO) analyses using the web server Enrichr (Chen et al., 2013; Kuleshov et al., 2016). The results of biological pathways (GOBP) were provided in Table S2.

### Label-free proteomics data analysis

Data were analyzed using MaxQuant (version 1.5.8.3) (Cox and Mann, 2008; Cox et al., 2011) and searched against UniProtKB *H. sapiens* database (86749 sequences - 13/06/2012). Unless otherwise stated, all MaxQuant settings were default. Variable modifications of acetyl (Protein N-term) and oxidation (M) were considered, along with the fixed modification of carbamidomethyl (C). Enzyme specificity was set to trypsin/P, and a false discovery rate of 1 % was set as a threshold at protein, peptide and site levels, and a mass deviation of 6 ppm was set for main search and 20 ppm for MS2 peaks. Match between runs was applied, and label-free quantification (LFQ) was selected.

The MaxQuant proteinGroups.txt file was used for downstream proteome analysis. All decoy and 'putative contaminant' entries were removed, as were any identified only by site and those with fewer than 4 reported LFQ values for any single experimental group (WT, DBD Mut

and SUMO Mut). This left 3639 protein groups comparable across all cell types. Zero LFQ values were replaced in Perseus (Tyanova et al., 2016), from a normal distribution of existing  $\log_{10}$  LFQ intensities downshifted 1.8 and of width 0.3. Proteins were defined as statistically differing between groups using the Perseus unpaired two-samples Student's t-test truncated by 1% permutation-based FDR using an S0 value of 0.1. No apparent specificity was entered as an empty cell in the spreadsheet.

PCA plotting was performed using Perseus software. GOBP enrichment analysis was performed on Enrichr server (Table S4).

Protein-protein interaction visualization was performed using a web server named STRING (<https://string-db.org>).

### **Visualization of over-layered analysis of microarray and proteomics datasets**

A free web-based multi-omics data visualization application named PaintOmics 3 (<http://bioinfo.cipf.es/paintomics/>) (Hernandez-de-Diego et al., 2018) was used to do the over-layered analysis of microarray and proteomics datasets.

## **DATA AND SOFTWARE AVAILABILITY**

### **Data availability**

The accession number for the microarray data reported in this paper is EMBL-EBI: E-MTAB-7951.

The mass spectrometry proteomics data have been deposited to the ProteomeXchange Consortium via the PRIDE (Perez-Riverol et al., 2019) partner repository with the dataset identifier PXD013737.

## **REFERENCE**

- Chen, E.Y., Tan, C.M., Kou, Y., Duan, Q., Wang, Z., Meirelles, G. V., Clark, N.R., and Ma'ayan, A. (2013). Enrichr: Interactive and collaborative HTML5 gene list enrichment analysis tool. *BMC Bioinformatics* 14.
- Cox, J., and Mann, M. (2008). MaxQuant enables high peptide identification rates, individualized p.p.b.-range mass accuracies and proteome-wide protein quantification. *Nat. Biotechnol.* 26, 1367–1372.
- Cox, J., Neuhauser, N., Michalski, A., Scheltema, R.A., Olsen, J. V., and Mann, M. (2011). Andromeda: A peptide search engine integrated into the MaxQuant environment. *J. Proteome Res.* 10, 1794–1805.
- Gentleman, R., Carey, V., Bates, D., Bolstad, B., Dettling, M., Dudoit, S., Ellis, B., Gautier, L., Ge, Y., Gentry, J., et al. (2004). Bioconductor: open software development for computational biology and bioinformatics. *Genome Biol.* 5, R80.
- Hernandez-de-Diego, R., Tarazona, S., Martinez-Mira, C., Balzano-Nogueira, L., Furio-Tari, P., Pappas, G.J., and Conesa, A. (2018). PaintOmics 3: a web resource for the pathway analysis and visualization of multi-omics data. *BioRxiv* 1–7.



Kuleshov, M. V., Jones, M.R., Rouillard, A.D., Fernandez, N.F., Duan, Q., Wang, Z., Koplev, S., Jenkins, S.L., Jagodnik, K.M., Lachmann, A., et al. (2016). Enrichr: a comprehensive gene set enrichment analysis web server 2016 update. *Nucleic Acids Res.* *44*, W90–W97.

Perez-Riverol, Y., Csordas, A., Bai, J., Bernal-Llinares, M., Hewapathirana, S., Kundu, D.J., Inuganti, A., Griss, J., Mayer, G., Eisenacher, M., et al. (2019). The PRIDE database and related tools and resources in 2019: Improving support for quantification data. *Nucleic Acids Res.* *47*, D442–D450.

Ran, F.A., Hsu, P.D., Wright, J., Agarwala, V., Scott, D.A., and Zhang, F. (2013). Genome engineering using the CRISPR-Cas9 system. *Nat. Protoc.* *8*, 2281–2308.

Shevchenko, A., Tomas, H., Havliš, J., Olsen, J. V., and Mann, M. (2007). In-gel digestion for mass spectrometric characterization of proteins and proteomes. *Nat. Protoc.* *1*, 2856–2860.

Tyanova, S., Temu, T., Sinitcyn, P., Carlson, A., Hein, M.Y., Geiger, T., Mann, M., and Cox, J. (2016). The Perseus computational platform for comprehensive analysis of (prote)omics data. *Nat. Methods* *13*, 731–740.

Wang, Y., Alhaque, S., Cameron, K., Meseguer-Ripolles, J., Lucendo-Villarin, B., Rashidi, H., and Hay, D.C. (2017). Defined and Scalable Generation of Hepatocyte-like Cells from Human Pluripotent Stem Cells. *J. Vis. Exp.* 1–8.
